# Supplementary material for: Absolute Configuration Determination of Two Diastereomeric Neovasifuranones A and B from Fusarium oxysporum R1 by a Combination of Mosher’s Method and Chiroptical Approach
Source: MDPI journal article supplement (doi:10.3390/jof8010040), 2021-12-31
Supplement: s1 [file s1]

# Supplementary materials for

## Absolute configuration determination of two diastereomeric polyketides neovasifuranones A and B from *Fusarium oxysporum* R1 by a combination of Mosher's method and chiroptical approach

Zhiyang Fu <sup>1</sup>, Yuanyuan Liu <sup>1</sup>, Meijie Xu <sup>1</sup>, Xiaojun Yao <sup>2</sup>, Hong Wang <sup>1</sup> and Huawei Zhang <sup>1,\*</sup>

<sup>1</sup> School of Pharmaceutical Sciences, Zhejiang University of Technology, Hangzhou 310014, China; fuzhiyoung@163.com

<sup>2</sup> Department of Chemistry, Lanzhou University, Lanzhou 730000, China

<sup>3</sup> Key Laboratory of Marine Fishery Resources Exploiment & Utilization of Zhejiang Province, Hangzhou 310014, China

\* Correspondence: hwzhang@zjut.edu.cn; Tel.: 0086-571-88320913

### Contents

|                                                                                                                                     |    |
|-------------------------------------------------------------------------------------------------------------------------------------|----|
| Figure S1. (+) ESI-MS spectrum of compound <b>3</b> .....                                                                           | 2  |
| Figure S2. (+) ESI-MS spectrum of compound <b>4</b> .....                                                                           | 3  |
| Figure S3. IR (KBr) spectrum of compound <b>3</b> .....                                                                             | 4  |
| Figure S4. IR (KBr) spectrum of compound <b>4</b> .....                                                                             | 5  |
| Figure S5. <sup>1</sup> H NMR (600 MHz, (CD <sub>3</sub> ) <sub>2</sub> SO) spectrum of compound <b>3</b> .....                     | 6  |
| Figure S6. <sup>13</sup> C NMR (151 MHz, (CD <sub>3</sub> ) <sub>2</sub> SO) spectrum of compound <b>3</b> .....                    | 7  |
| Figure S7. <sup>1</sup> H NMR (600 MHz, CDCl <sub>3</sub> ) spectrum of compound <b>4</b> .....                                     | 8  |
| Figure S8. <sup>13</sup> C NMR (151 MHz, CDCl <sub>3</sub> ) spectrum of compound <b>4</b> .....                                    | 9  |
| Figure S9. DEPT (151 MHz, CDCl <sub>3</sub> ) spectrum of compound <b>4</b> .....                                                   | 10 |
| Figure S10. UV spectrum of compound <b>3</b> in MeOH.....                                                                           | 11 |
| Figure S11. UV spectrum of compound <b>4</b> in MeOH.....                                                                           | 12 |
| Figure S12. <sup>1</sup> H NMR (600 MHz, pyridine- <i>d</i> <sub>5</sub> ) spectrum of ( <i>R</i> )-MTPA of compound <b>3</b> ..... | 13 |
| Figure S13. <sup>1</sup> H NMR (600 MHz, pyridine- <i>d</i> <sub>5</sub> ) spectrum of ( <i>S</i> )-MTPA of compound <b>3</b> ..... | 14 |
| Table S1. <sup>1</sup> H NMR spectral data for <b>3</b> and its MTPA esters <b>3a</b> and <b>3b</b> ( <sup>1</sup> H, 600 MHz)..... | 15 |
| Figure S14. <sup>1</sup> H NMR (600 MHz, pyridine- <i>d</i> <sub>5</sub> ) spectrum of ( <i>R</i> )-MTPA of compound <b>4</b> ..... | 16 |
| Figure S15. <sup>1</sup> H NMR (600 MHz, pyridine- <i>d</i> <sub>5</sub> ) spectrum of ( <i>S</i> )-MTPA of compound <b>4</b> ..... | 17 |
| Table S2. <sup>1</sup> H NMR spectral data for <b>4</b> and its MTPA esters <b>4a</b> and <b>4b</b> ( <sup>1</sup> H, 600 MHz)..... | 18 |
| Figure S16. Optimized conformers (≥1%) of <b>3</b> -(4 <i>R</i> , 8 <i>R</i> ) .....                                                | 19 |
| Figure S17. Optimized conformers (≥1%) of <b>3</b> -(4 <i>R</i> , 8 <i>S</i> ) .....                                                | 20 |
| Figure S18. Optimized conformers (≥1%) of <b>3</b> -(4 <i>S</i> , 8 <i>S</i> ).....                                                 | 21 |
| Figure S19. Optimized conformers (≥1%) of <b>3</b> -(4 <i>S</i> , 8 <i>R</i> ) .....                                                | 22 |

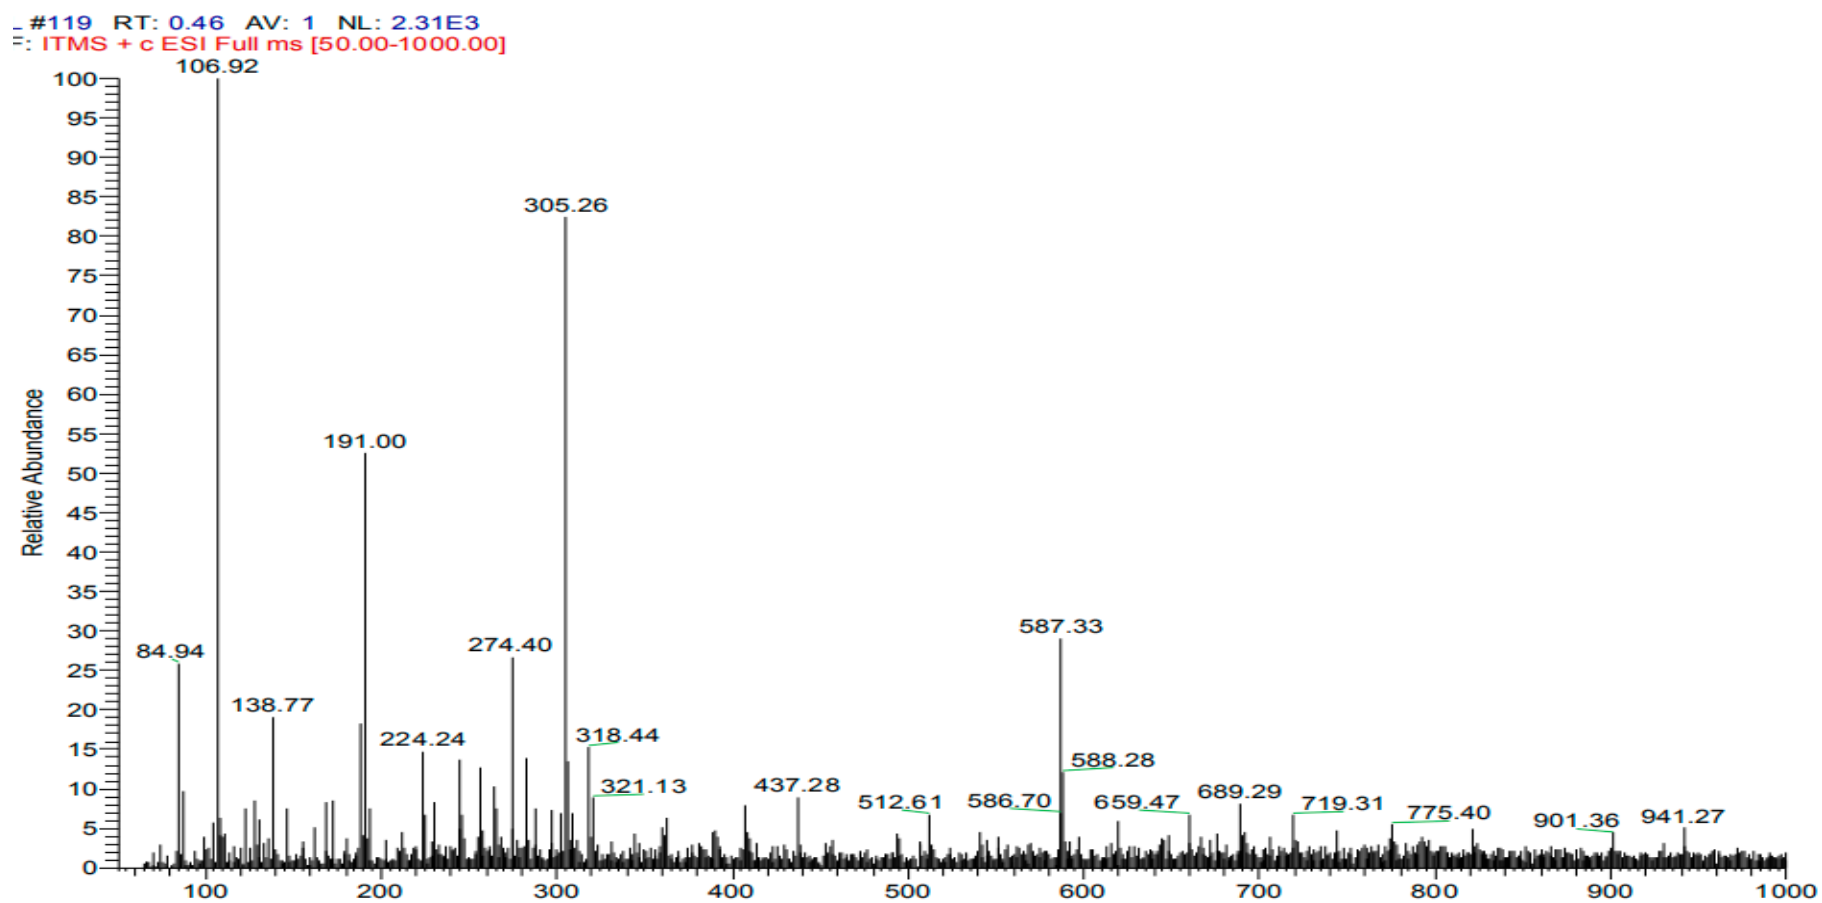

Figure S1. (+) ESI-MS spectrum of compound 3.

C4 #72-86 RT: 0.40-0.47 AV: 7 SB: 130 0.04-0.32 , 0.72-1.89 NL: 2.62E4  
F: ITMS + c ESI Full ms [50.00-1200.00]

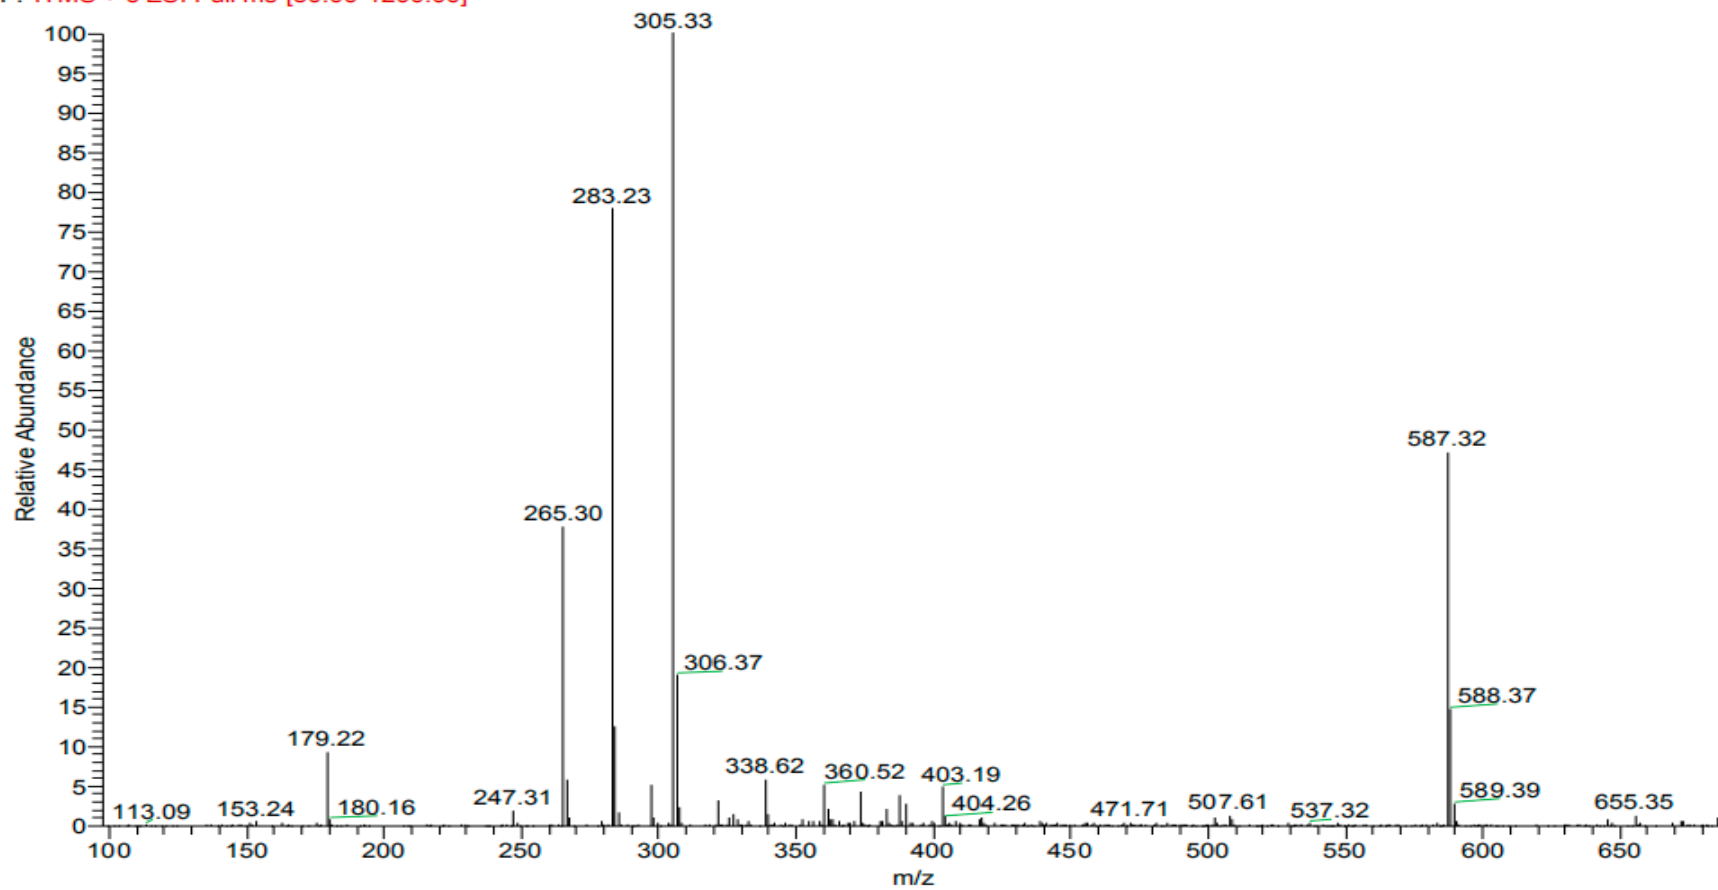

Figure S2. (+) ESI-MS spectrum of compound 4.

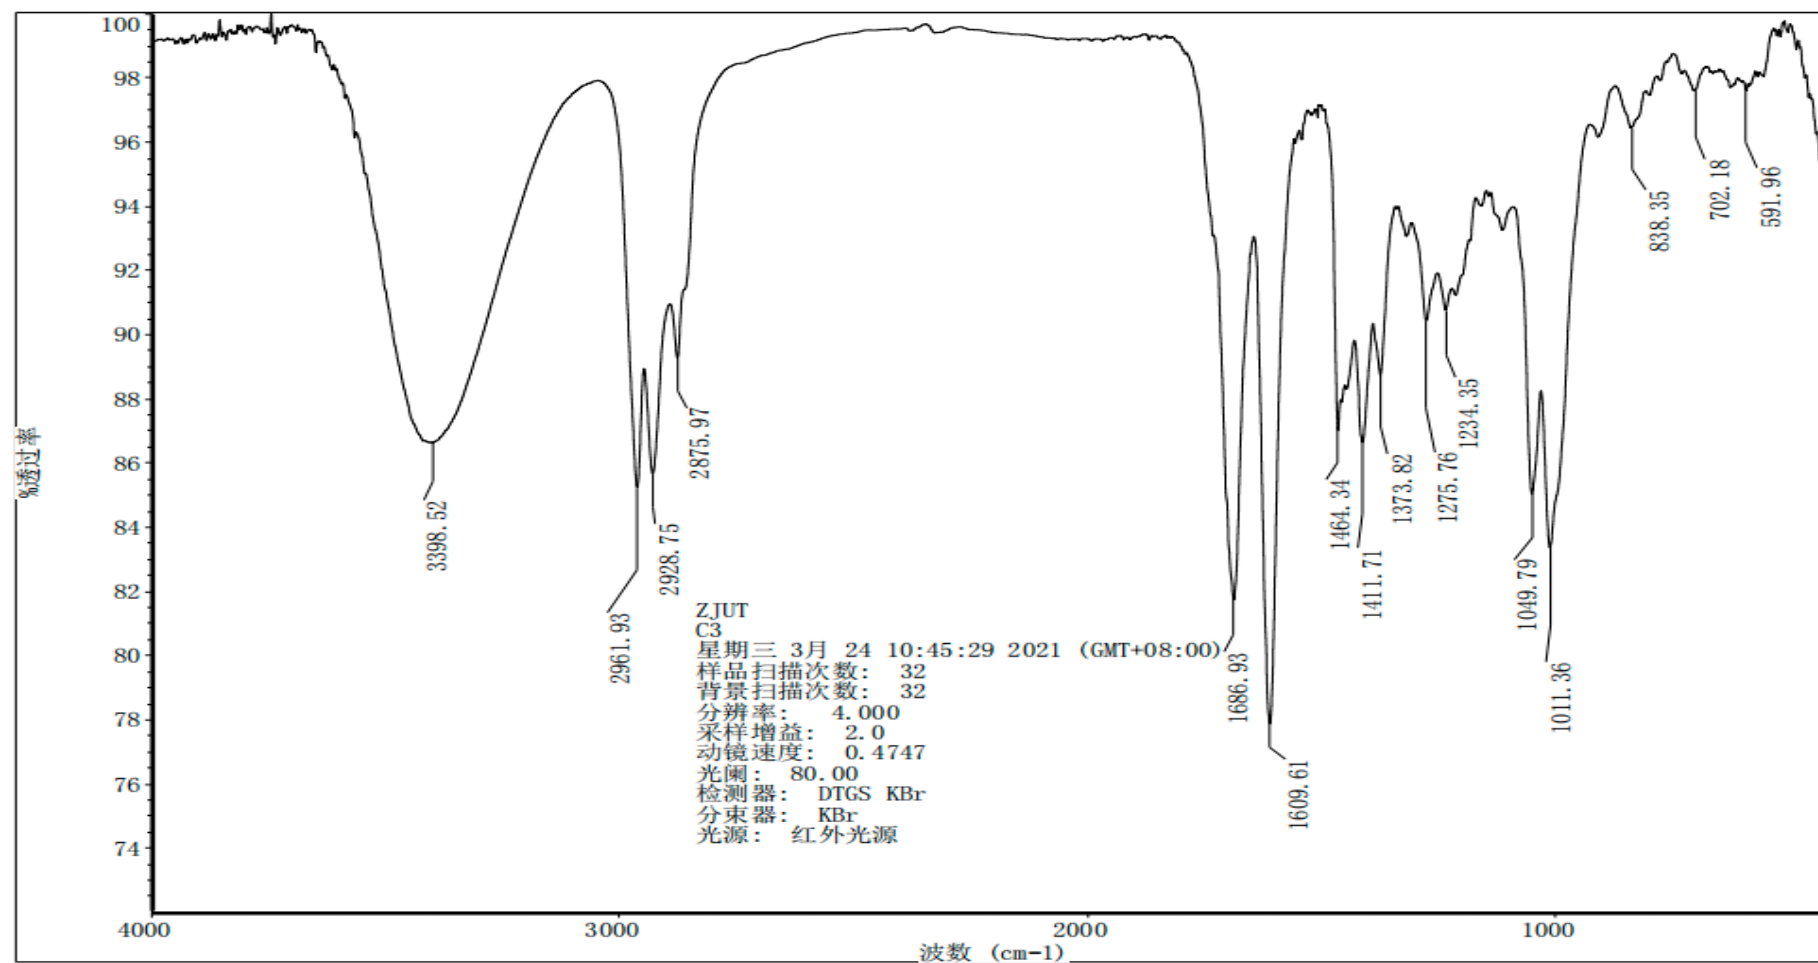

Figure S3. IR (KBr) spectrum of compound 3.

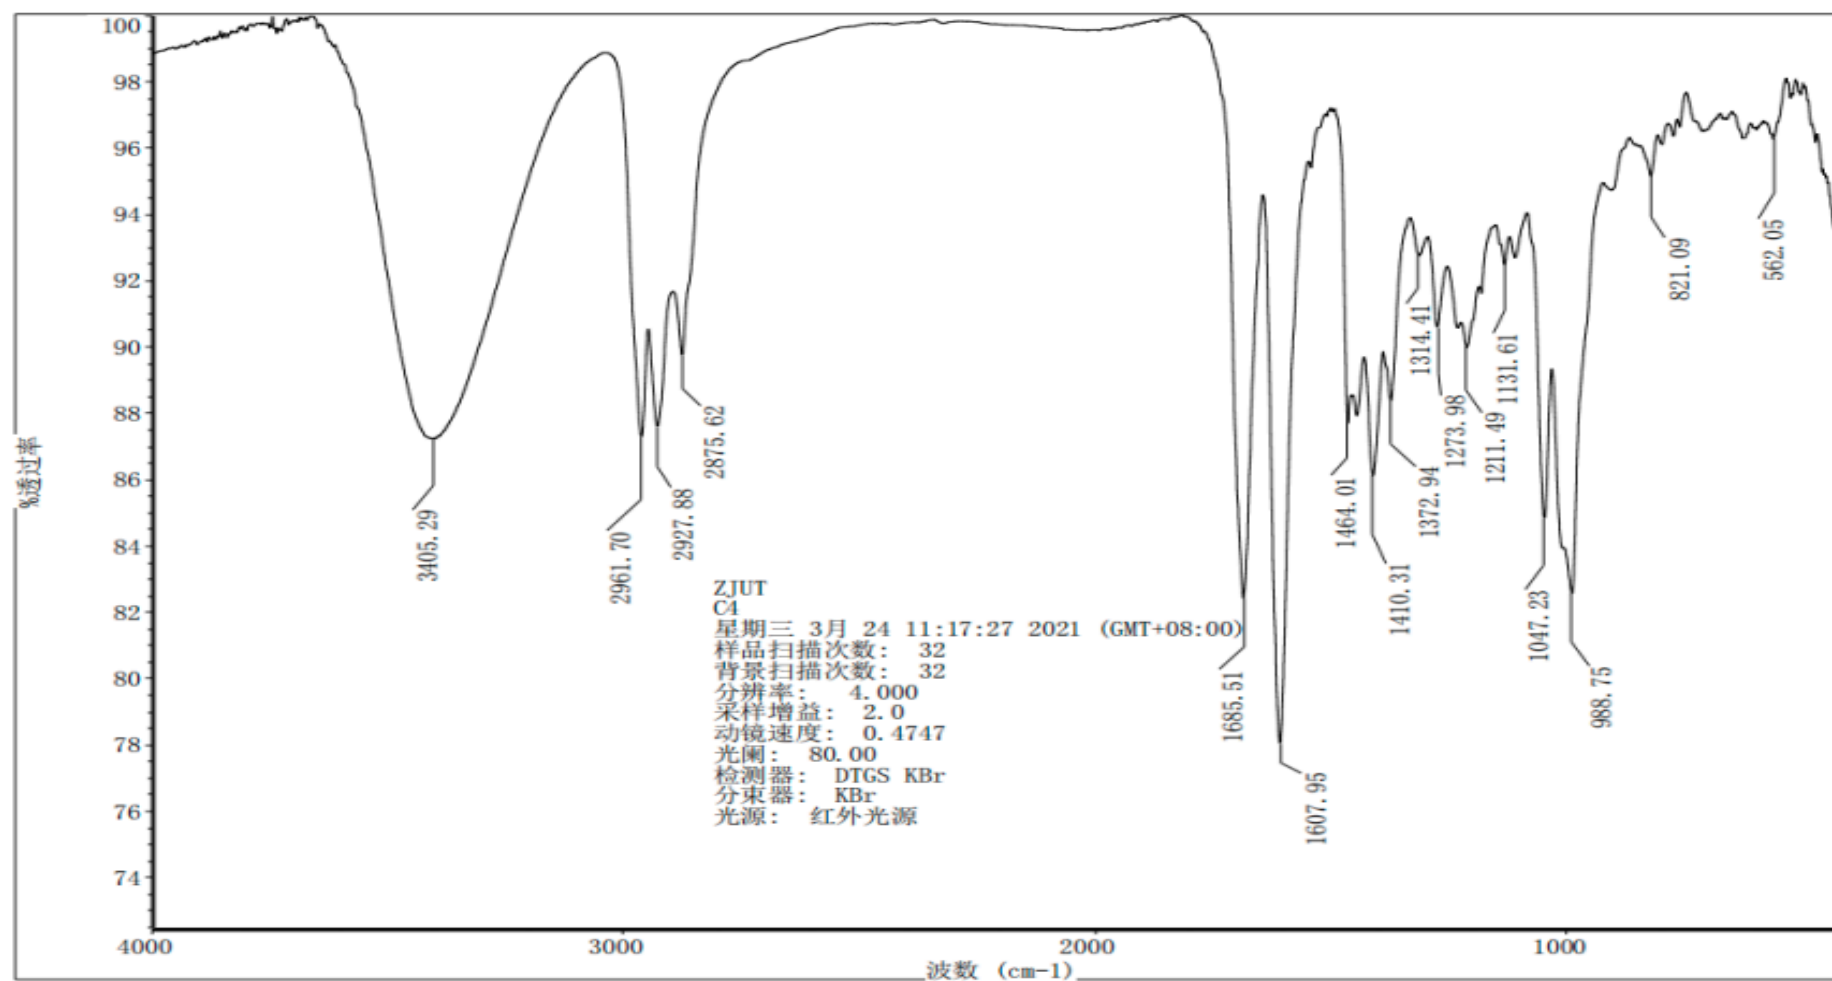

Figure S4. IR (KBr) spectrum of compound 4.

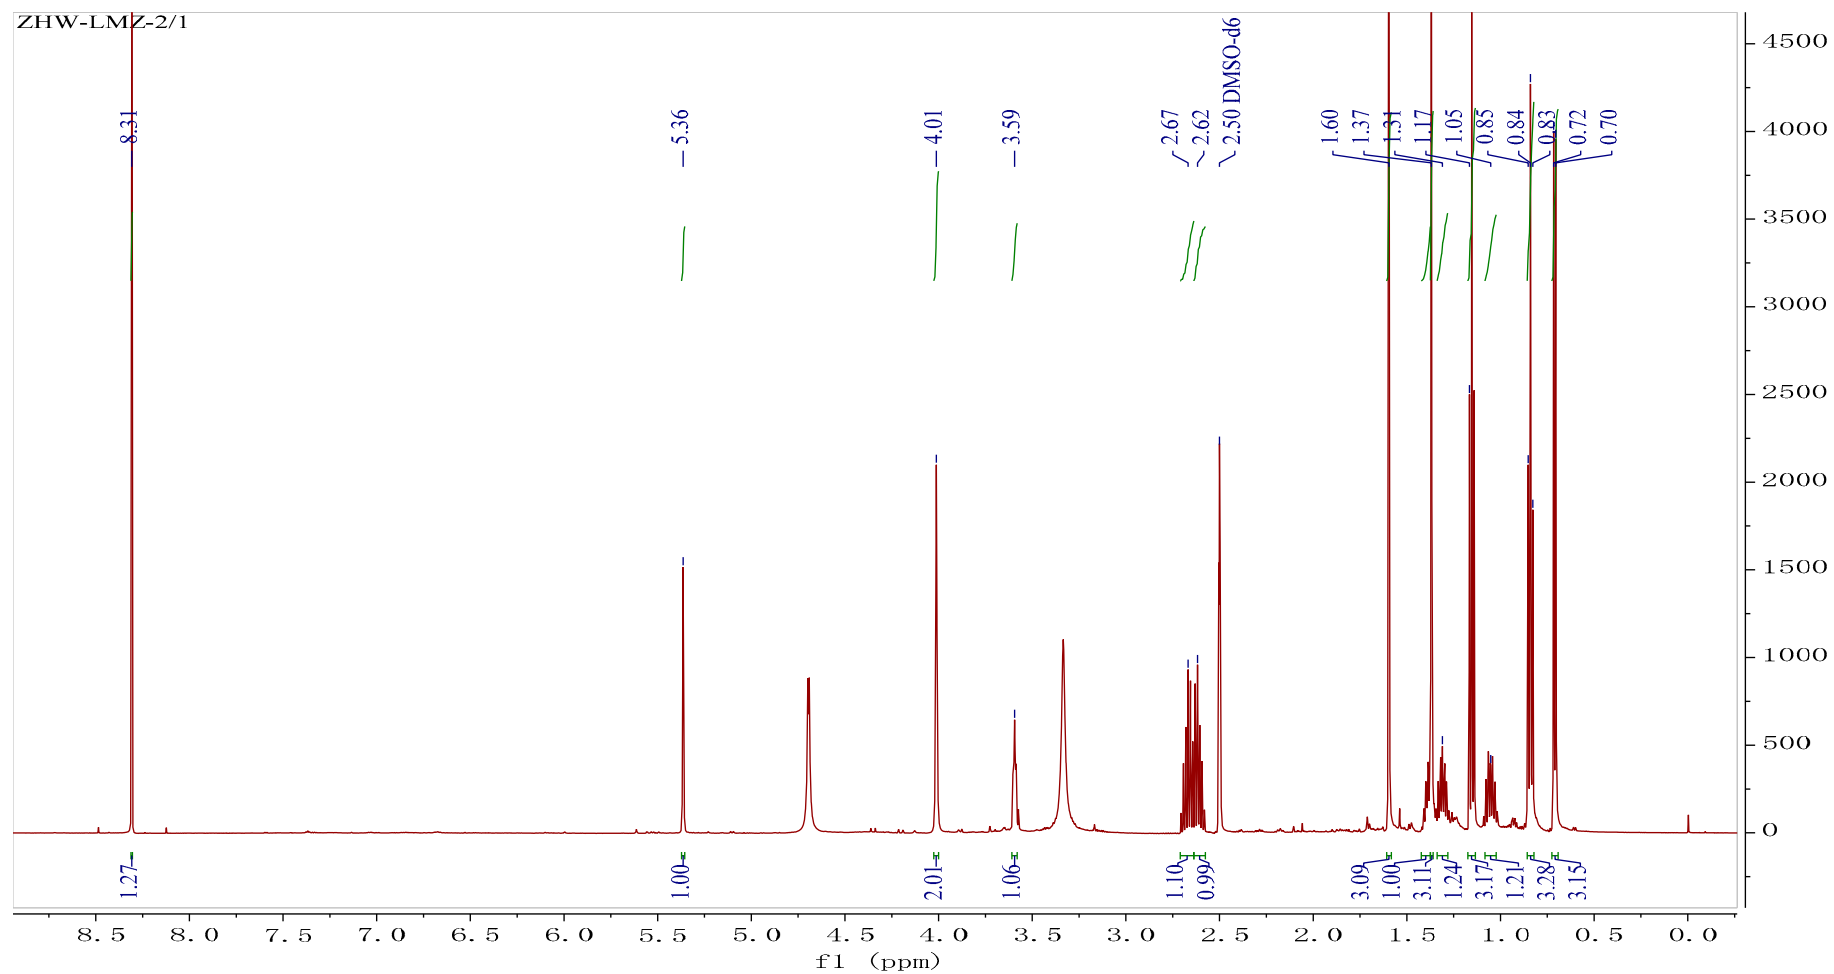

Figure S5.  $^1\text{H}$  NMR (600 MHz,  $(\text{CD}_3)_2\text{SO}$ ) spectrum of compound 3.

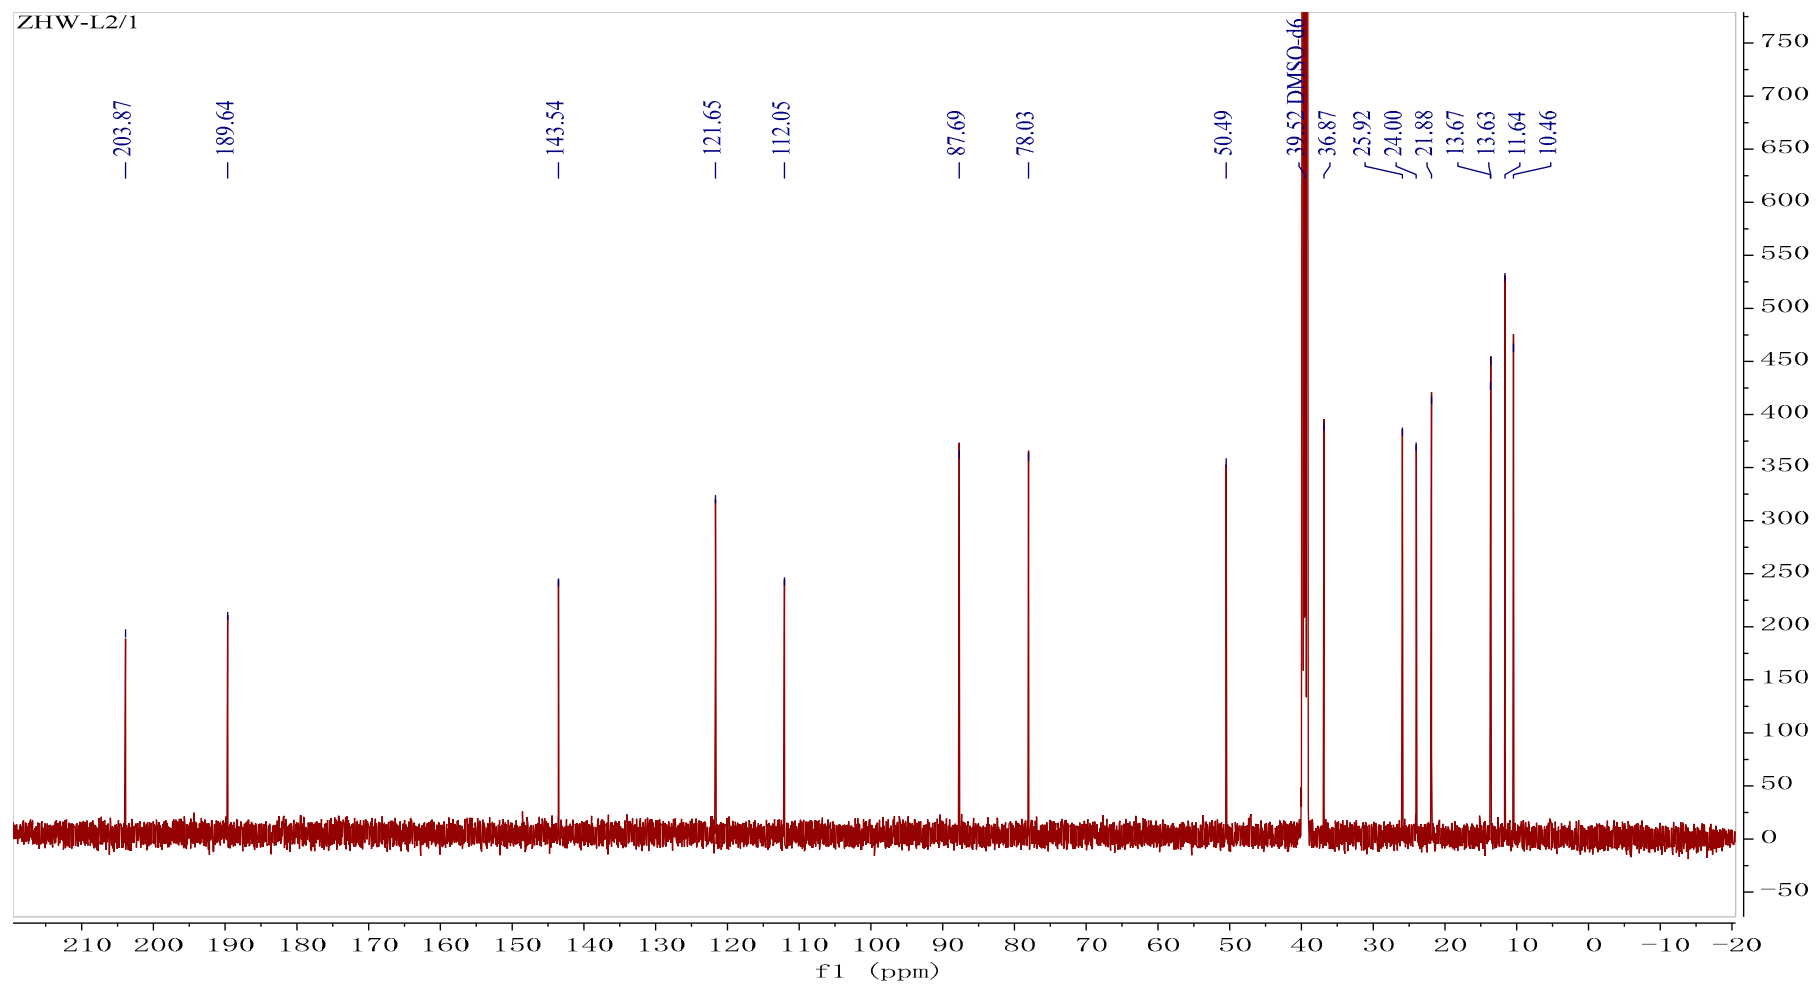

**Figure S6.**  $^{13}\text{C}$  NMR (151 MHz,  $(\text{CD}_3)_2\text{SO}$ ) spectrum of compound **3**.

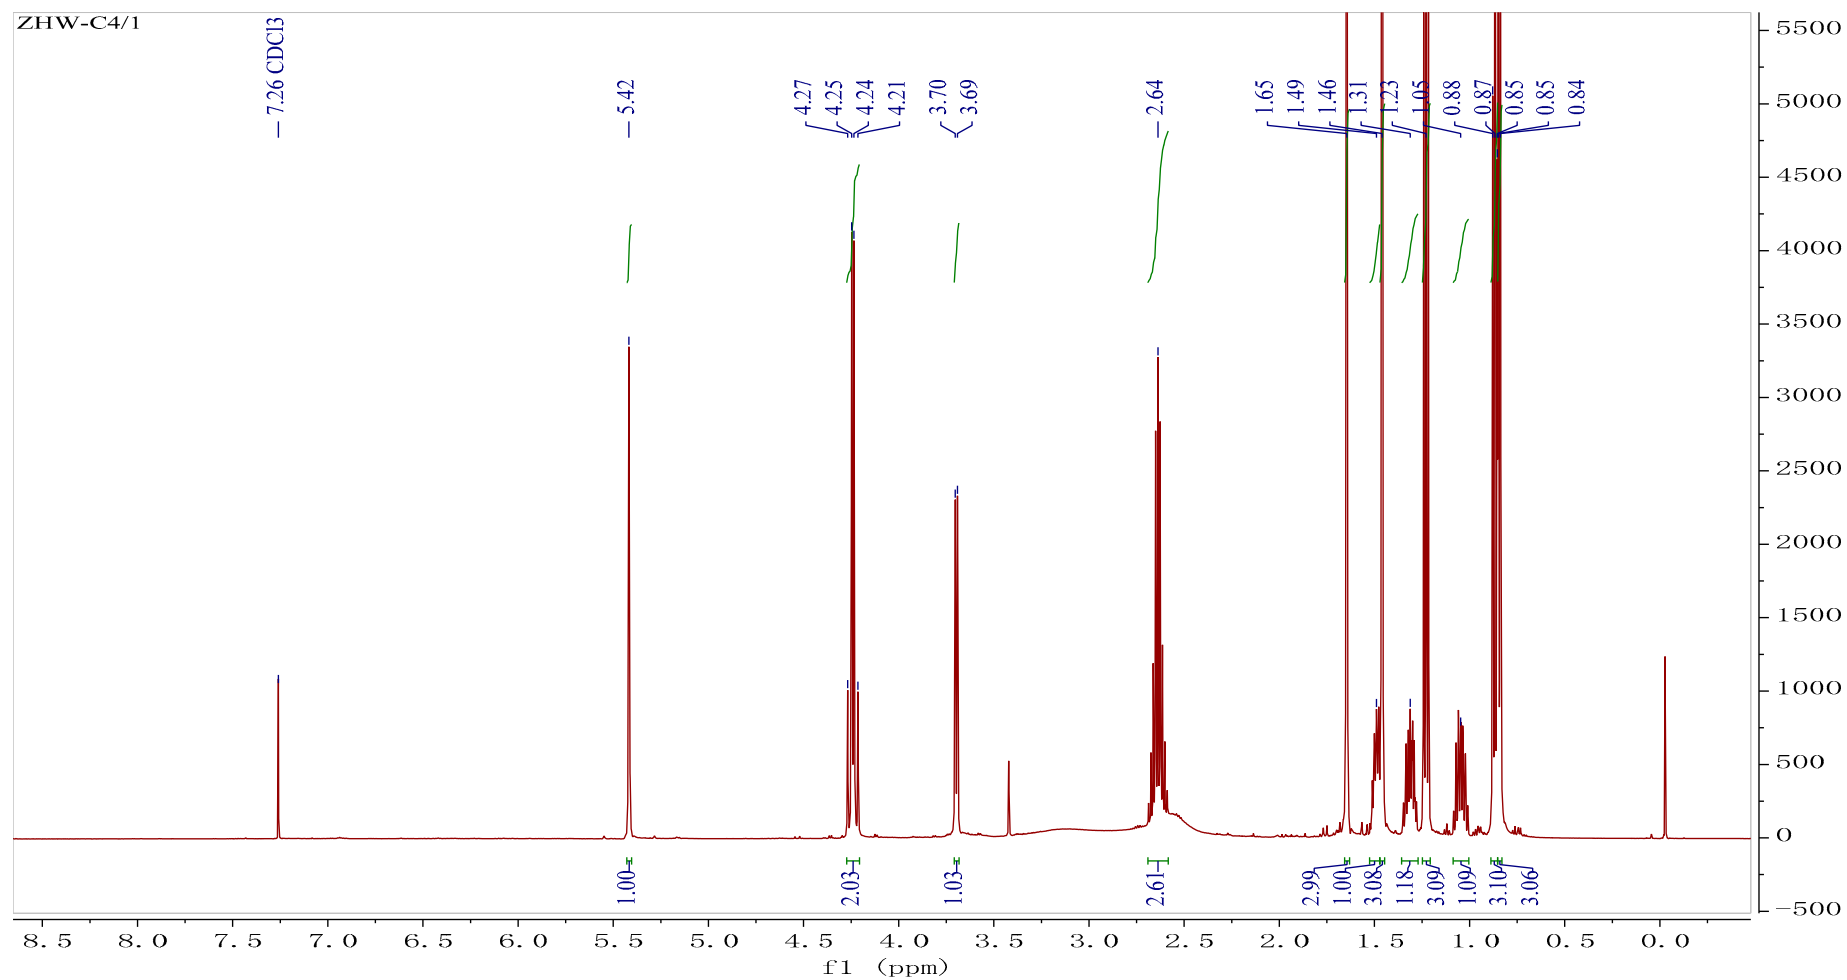

**Figure S7.**  $^1\text{H}$  NMR (600 MHz,  $\text{CDCl}_3$ ) spectrum of compound **4**.



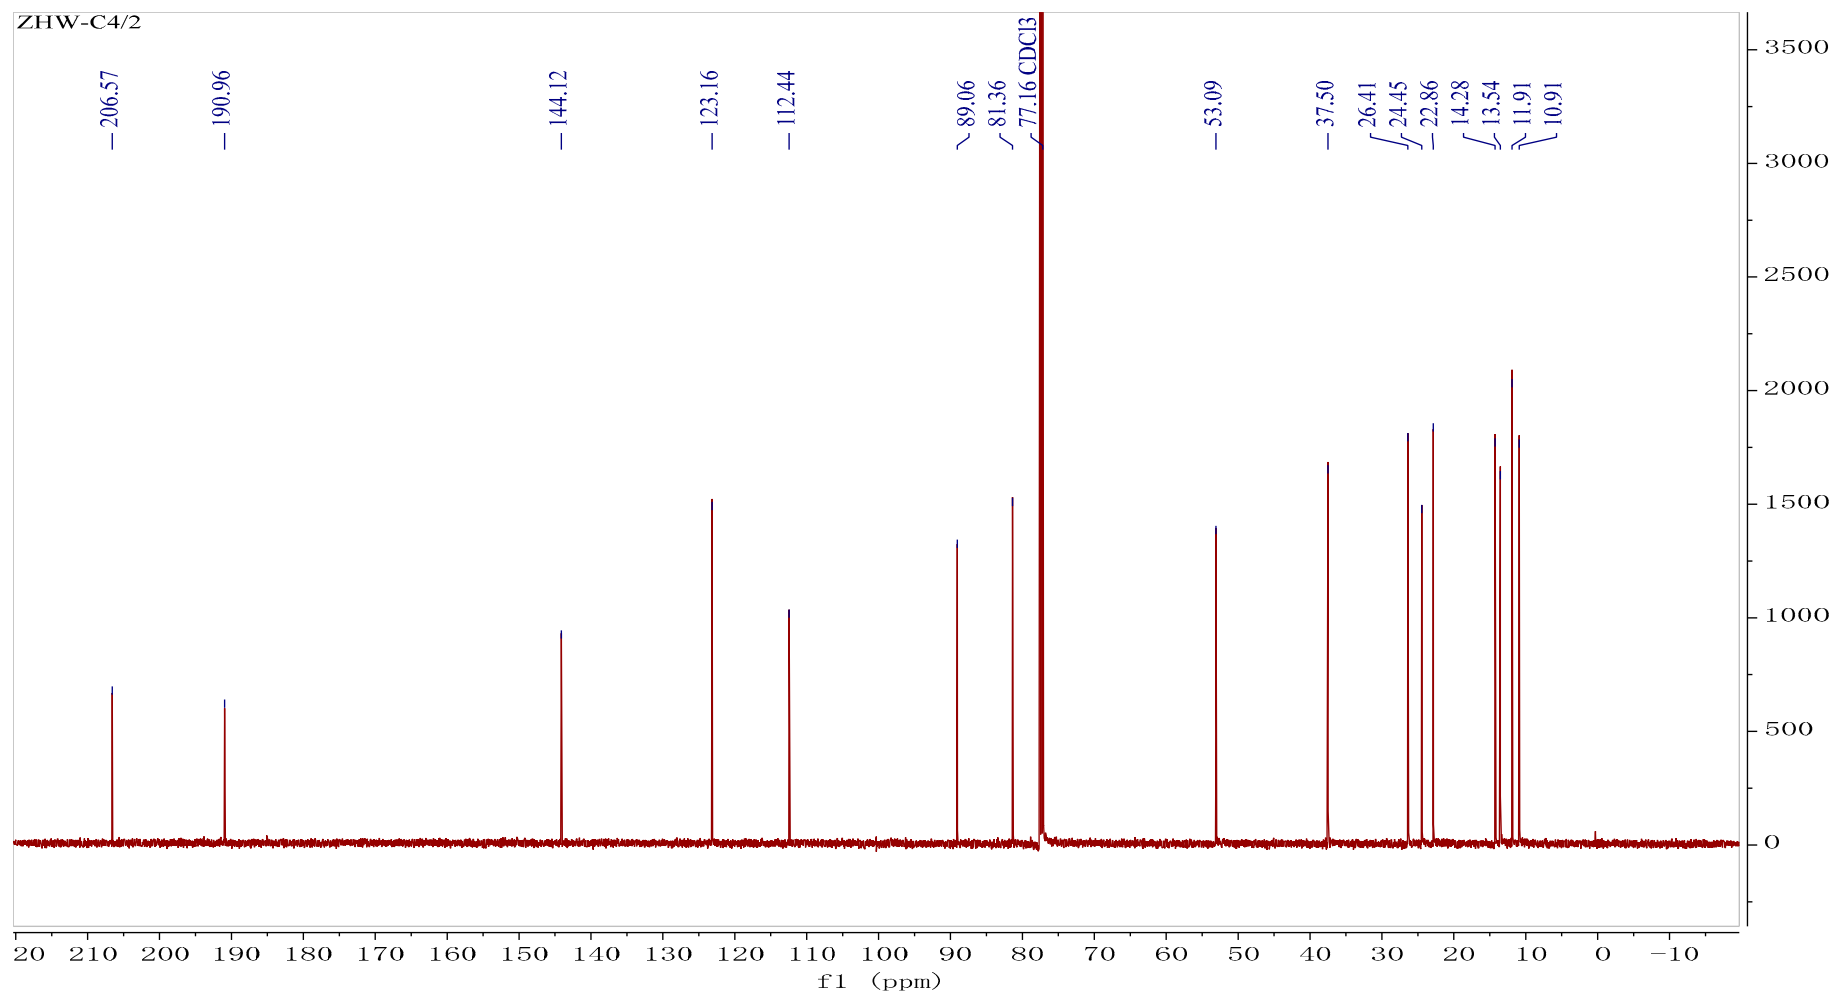

**Figure S8.**  $^{13}\text{C}$  NMR (151 MHz,  $\text{CDCl}_3$ ) spectrum of compound **4**.

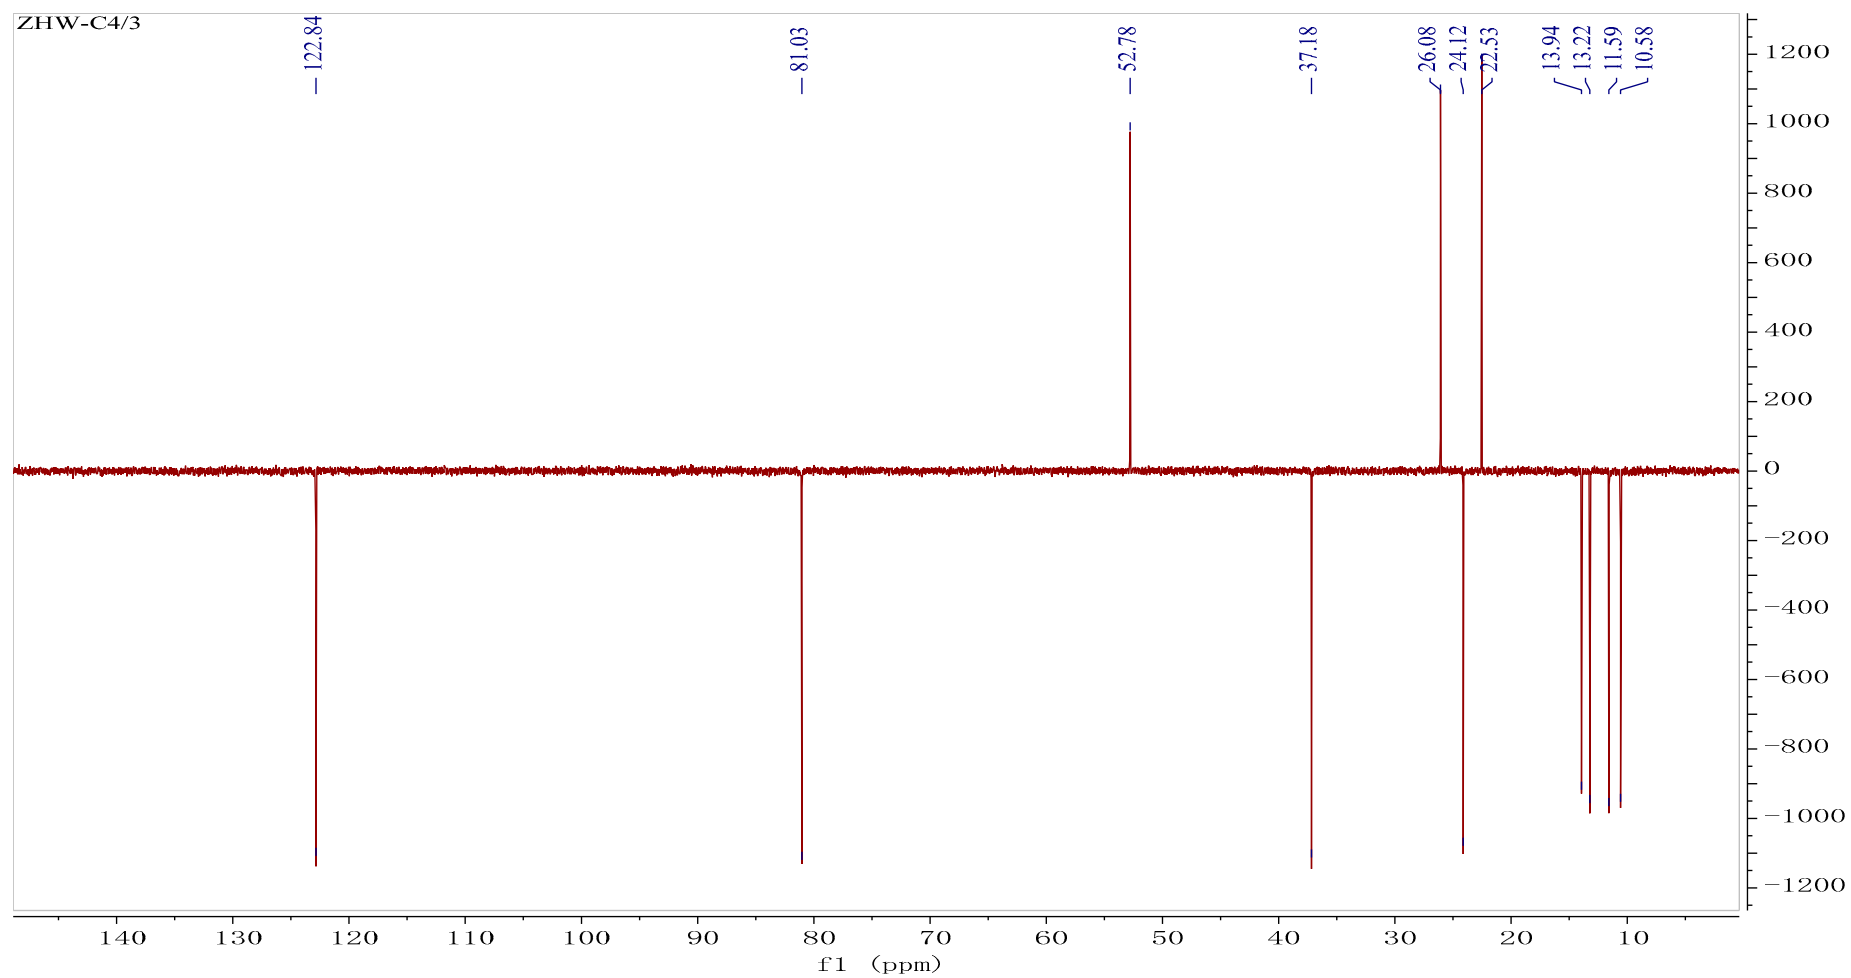

**Figure S9.** DEPT (151 MHz,  $\text{CDCl}_3$ ) spectrum of compound **4**.

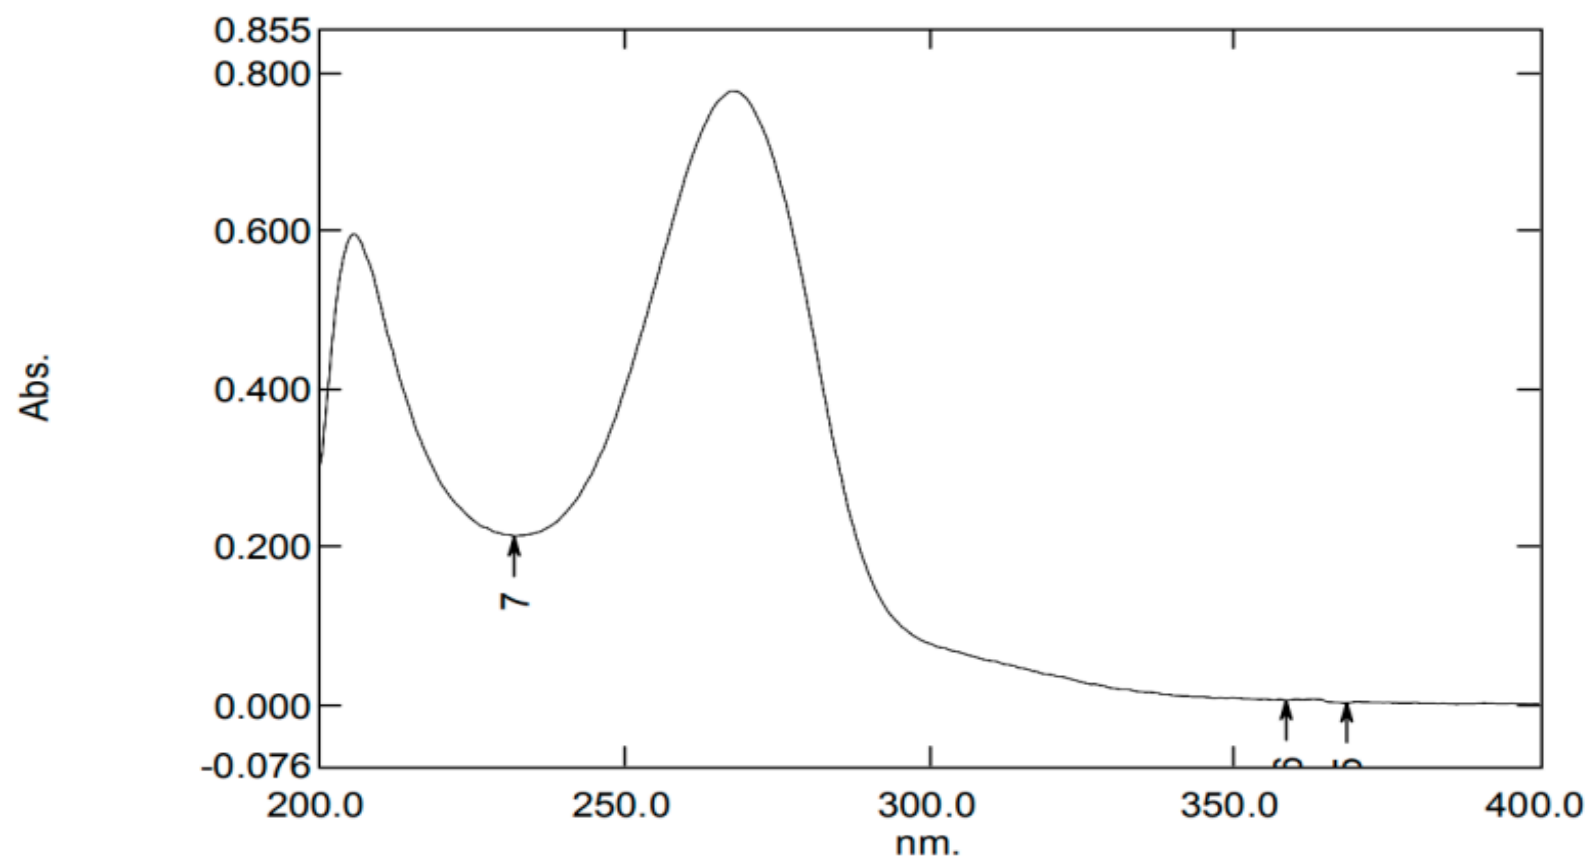

Figure S10. UV spectrum of compound 3 in MeOH.

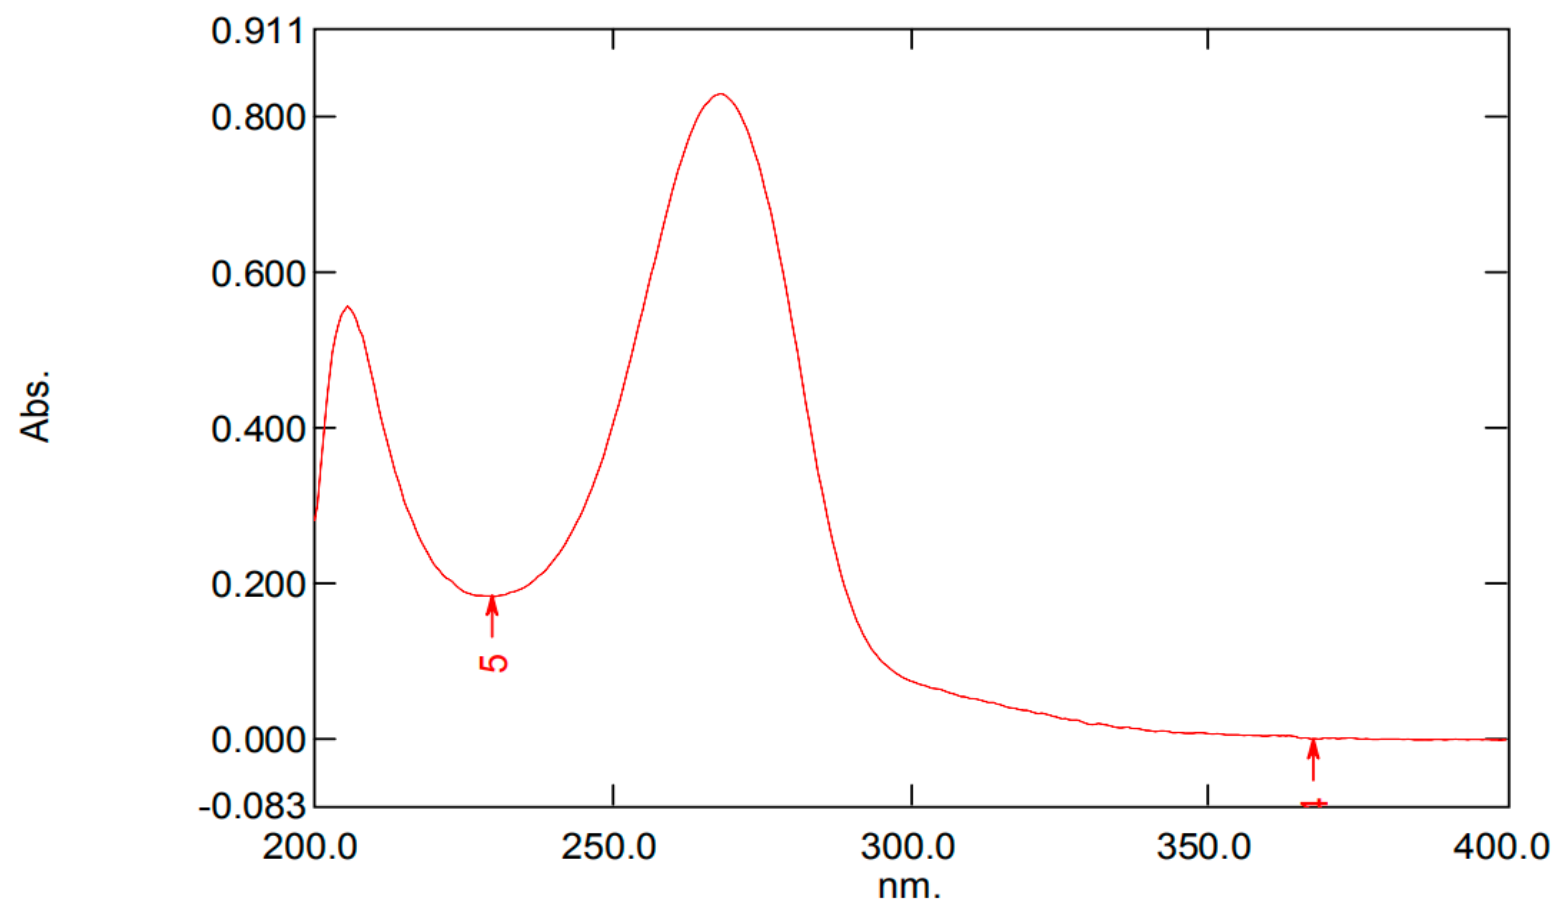

Figure S11. UV spectrum of compound 4 in MeOH.

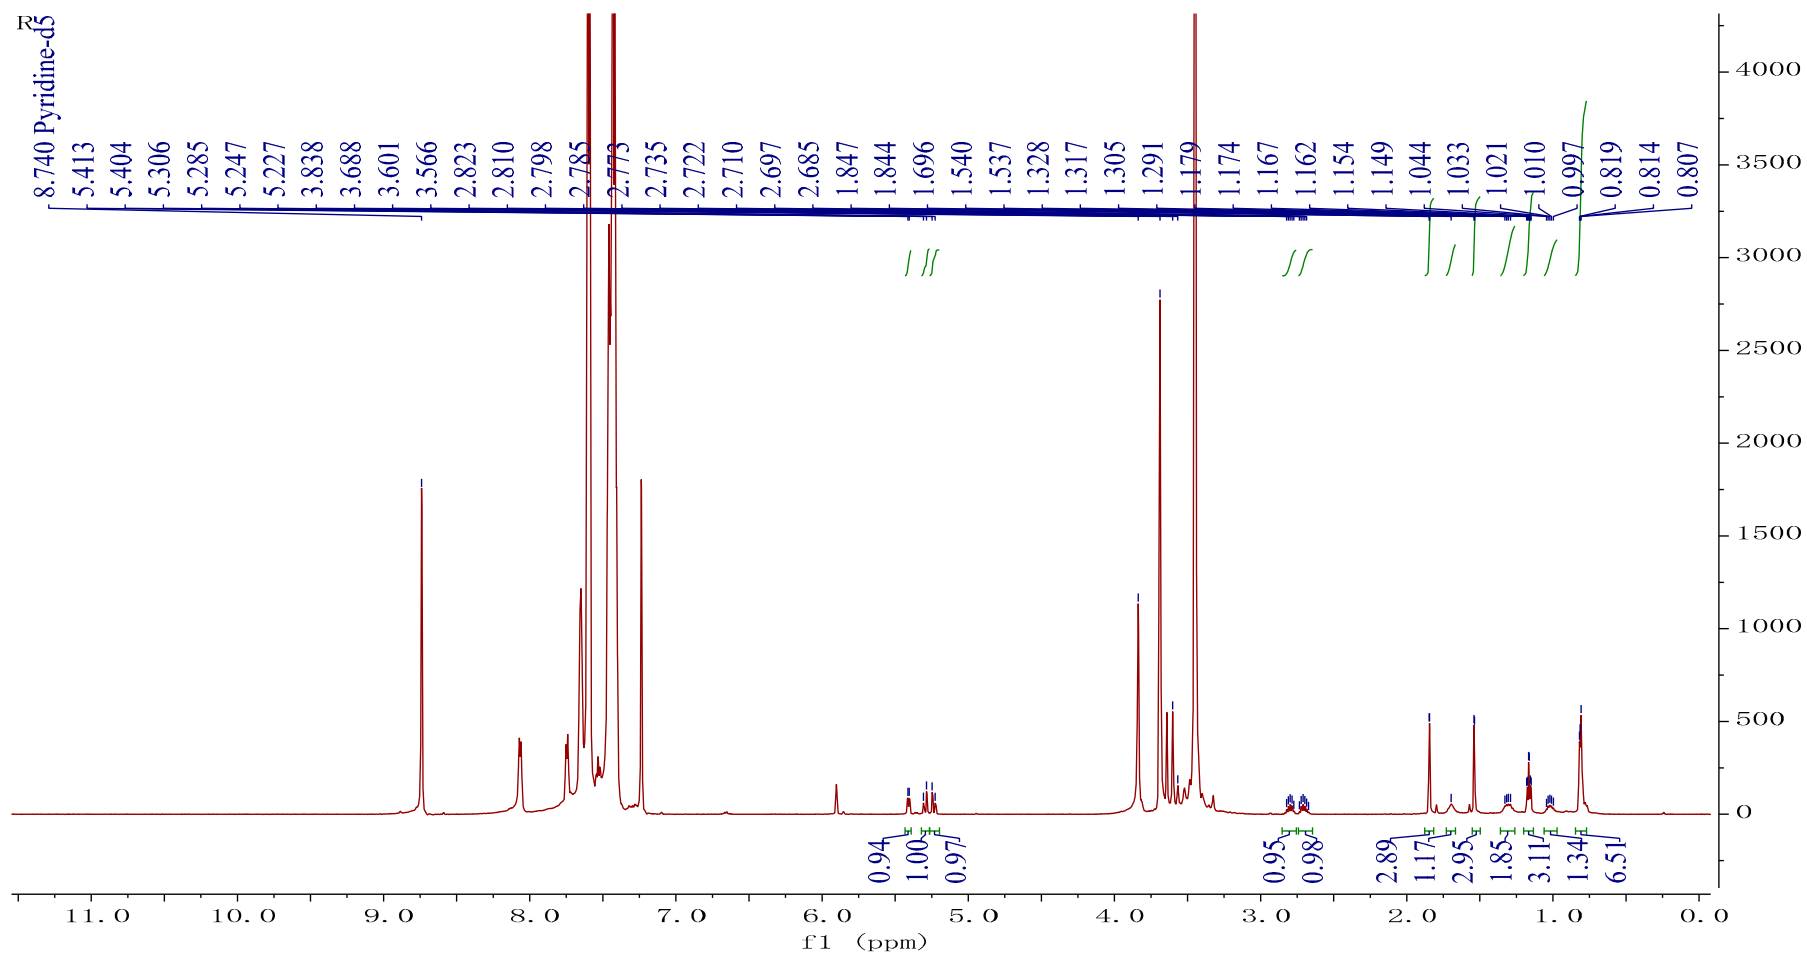

**Figure S12.** <sup>1</sup>H NMR (600 MHz, pyridine-*d*<sub>5</sub>) spectrum of (R)-MTPA of compound 3.

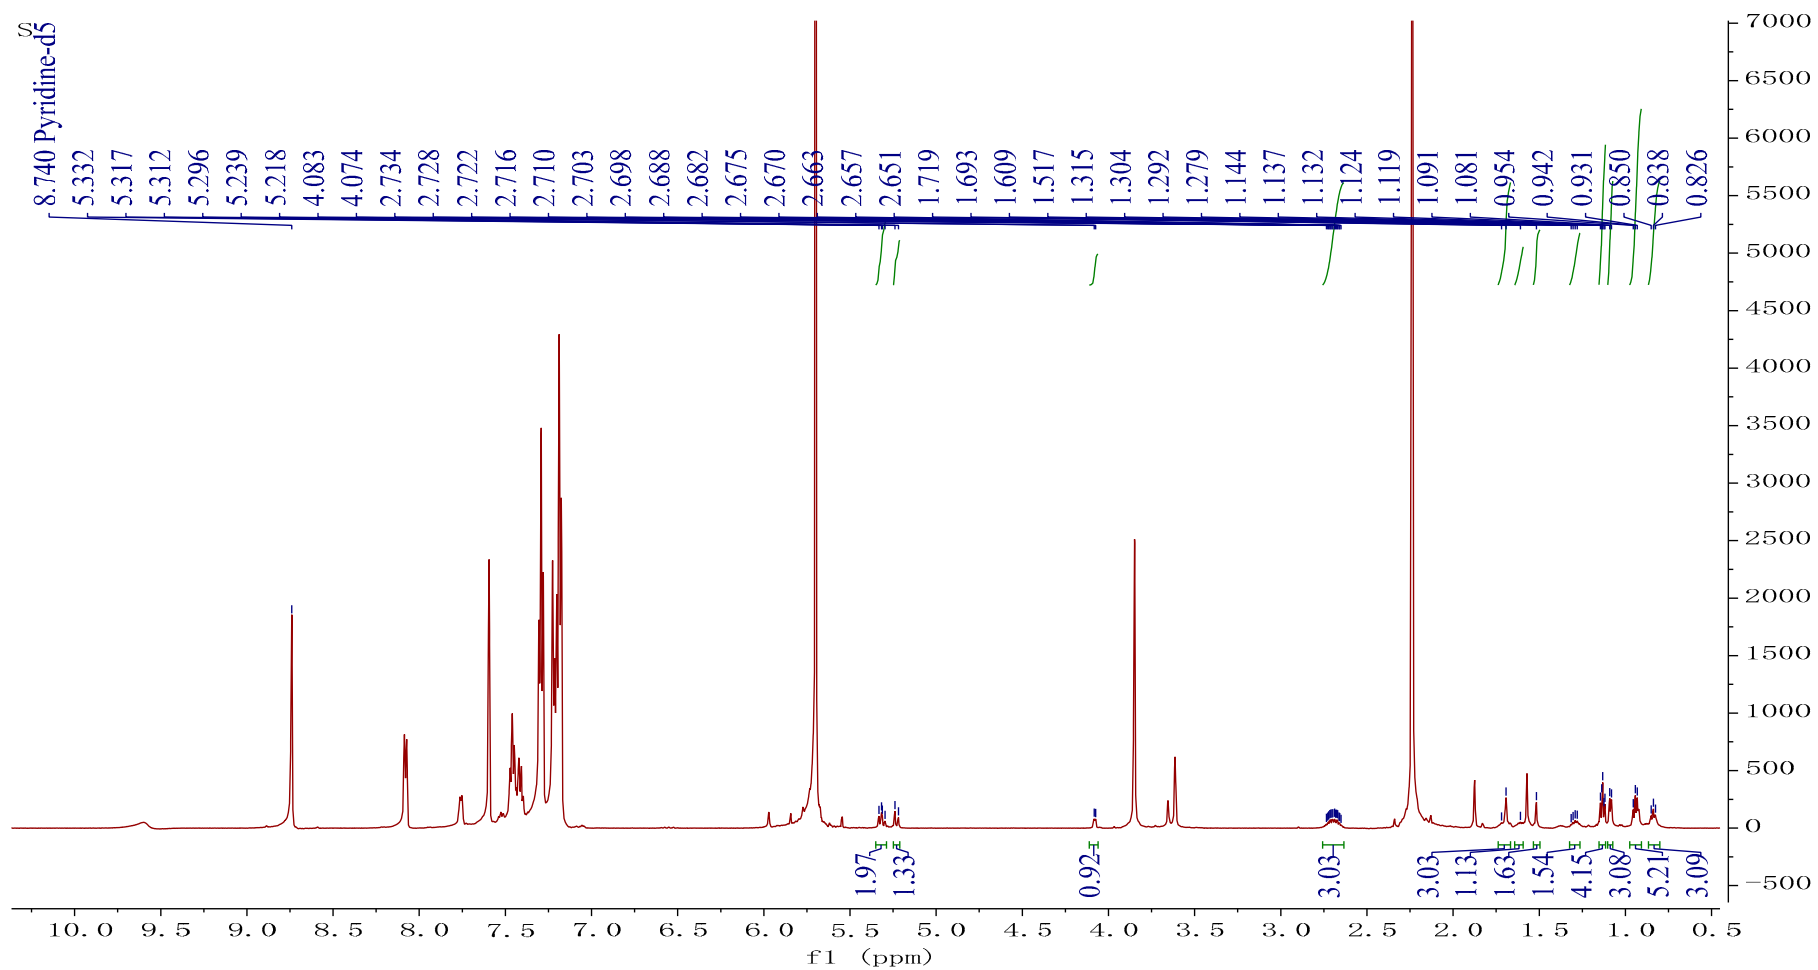

Figure S13. <sup>1</sup>H NMR (600 MHz, pyridine-*d*<sub>5</sub>) spectrum of (S)-MTPA of compound 3.

**Table S1.**  $^1\text{H}$  NMR spectral data for **3** and its MTPA esters **3a** and **3b** ( $^1\text{H}$ , 600 MHz).

| position | Compound <b>3</b> (in DMSO- $d_6$ )     | MTPA essters (in pyridine- $d_5$ ) |                                   |
|----------|-----------------------------------------|------------------------------------|-----------------------------------|
|          | $\delta_{\text{H}}$ (in ppm, $J$ in Hz) | $\delta_{\text{H}}$ ( <b>3a</b> )  | $\delta_{\text{H}}$ ( <b>3b</b> ) |
| 1        |                                         |                                    |                                   |
| 2        |                                         |                                    |                                   |
| 3        |                                         |                                    |                                   |
| 4        |                                         |                                    |                                   |
| 5        | 5.37 (1H, <i>m</i> )                    | 5.902 (1H, <i>m</i> )              | 5.971 (1H, <i>m</i> )             |
| 6        |                                         |                                    |                                   |
| 7        | 3.60 (1H, <i>t</i> , $J = 4.2$ )        | 5.404 (1H, <i>t</i> , $J = 5.6$ )  | 5.849 (1H, <i>t</i> , $J = 3.1$ ) |
| 7-OH     | 8.31 (1H, <i>s</i> )                    |                                    |                                   |
| 8        | 1.39 (1H, <i>m</i> )                    | 1.322 (1H, <i>m</i> )              | 1.292 (1H, <i>m</i> )             |
| 9        | 1.06 (1H, <i>m</i> )                    | 1.177 (1H, <i>m</i> )              | 1.145 (1H, <i>m</i> )             |
|          | 1.31 (1H, <i>m</i> )                    | 1.292 (1H, <i>m</i> )              | 1.123 (1H, <i>m</i> )             |
| 10       | 0.84 (3H, <i>t</i> , $J = 7.2$ )        | 1.154 (3H, <i>t</i> , $J = 7.5$ )  | 1.137 (3H, <i>t</i> , $J = 7.6$ ) |
| 11       | 2.62 (1H, <i>q</i> , $J = 7.2$ )        | 2.798 (1H, <i>q</i> , $J = 7.3$ )  | 2.703 (1H, <i>q</i> , $J = 7.4$ ) |
|          | 2.67 (1H, <i>q</i> , $J = 7.8$ )        | 2.710 (1H, <i>q</i> , $J = 7.4$ )  | 2.688 (1H, <i>q</i> , $J = 7.3$ ) |
| 12       | 1.16 (3H, <i>t</i> , $J = 7.2$ )        | 0.807 (1H, <i>q</i> , $J = 6.8$ )  | 0.942 (1H, <i>q</i> , $J = 6.8$ ) |
| 13       | 4.01 (2H, <i>s</i> )                    | 5.306 (2H, <i>s</i> )              | 5.296 (2H, <i>s</i> )             |
| 14       | 1.37 (3H, <i>s</i> )                    | 1.541 (3H, <i>s</i> )              | 1.571 (3H, <i>s</i> )             |
| 15       | 1.60 (3H, <i>d</i> , $J = 0.6$ )        | 1.847 (3H, <i>d</i> , $J = 1.7$ )  | 1.875 (3H, <i>d</i> , $J = 1.3$ ) |
| 16       | 0.71 (3H, <i>d</i> , $J = 6.6$ )        | 1.167 (3H, <i>d</i> , $J = 6.7$ )  | 1.092 (3H, <i>d</i> , $J = 6.5$ ) |

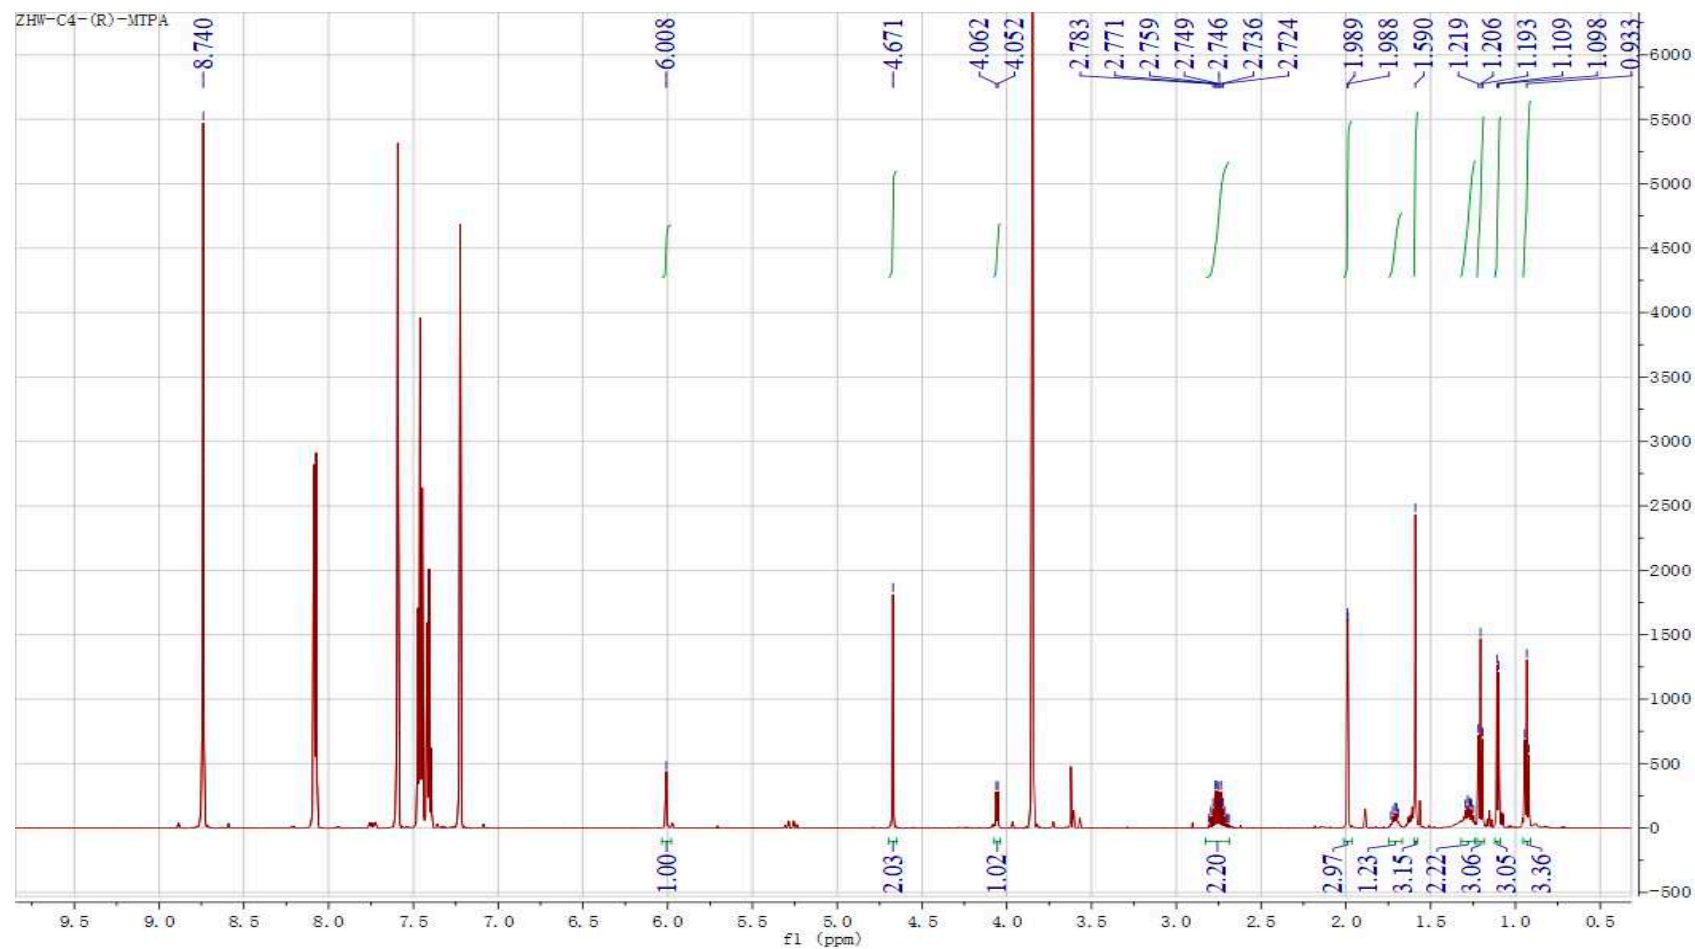

**Figure S14.**  $^1\text{H}$  NMR (600 MHz, pyridine- $d_5$ ) spectrum of (R)-MTPA of compound **4**.



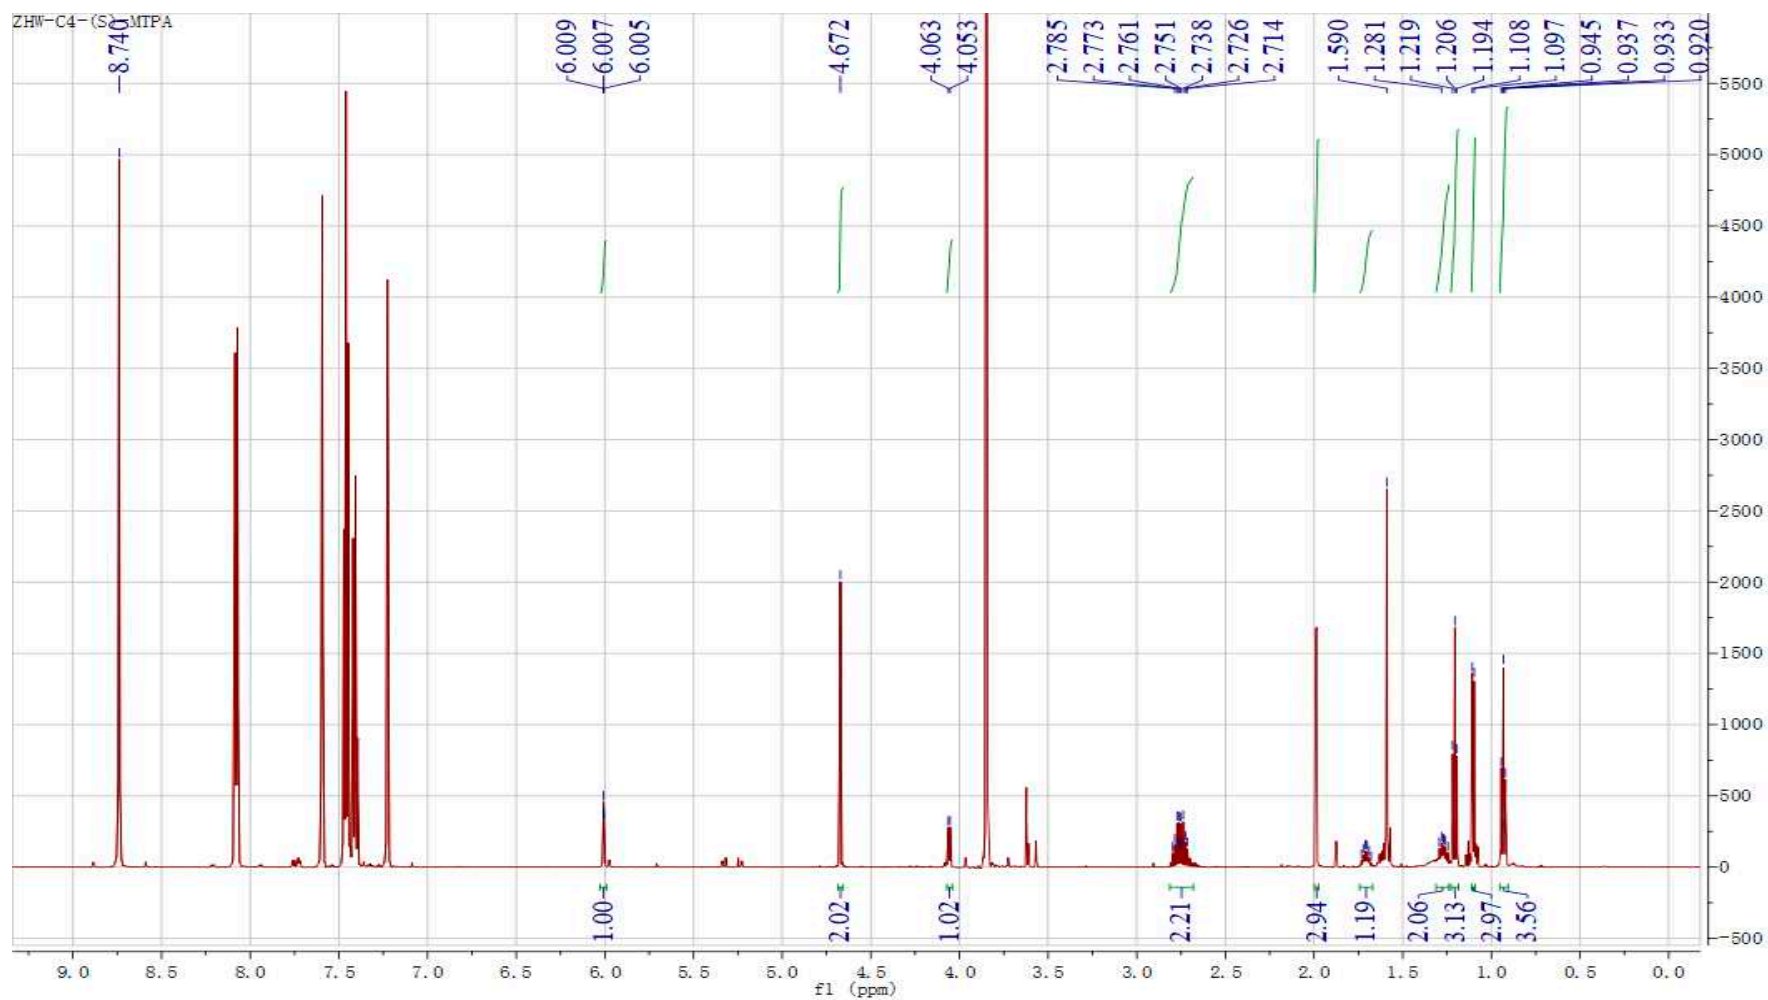

**Figure S15.**  $^1\text{H}$  NMR (600 MHz, pyridine- $d_5$ ) spectrum of (S)-MTPA of compound **4**.

**Table S2.** <sup>1</sup>H-NMR spectral data for **4** and its MTPA esters **4a** and **4b** (<sup>1</sup>H, 600 MHz).

| position | Compound <b>4</b> (in CDCl <sub>3</sub> ) | <b>4a</b> (in pyridine- <i>d</i> <sub>5</sub> ) | <b>4b</b> (in pyridine- <i>d</i> <sub>5</sub> ) |
|----------|-------------------------------------------|-------------------------------------------------|-------------------------------------------------|
|          | δ <sub>H</sub> (in ppm, J in Hz)          | δ <sub>H</sub> (in ppm, J in Hz)                | δ <sub>H</sub> (in ppm, J in Hz)                |
| 1        |                                           |                                                 |                                                 |
| 2        |                                           |                                                 |                                                 |
| 3        |                                           |                                                 |                                                 |
| 4        |                                           |                                                 |                                                 |
| 5        | 5.42 (1H, s)                              | 6.008 (1H, s)                                   | 6.009 (1H, s)                                   |
| 6        |                                           |                                                 |                                                 |
| 7        | 3.70 (1H, d, J = 6.9)                     | 4.507 (1H, d, J = 5.9)                          | 4.508 (1H, d, J = 5.8)                          |
| 7-OH     |                                           |                                                 |                                                 |
| 8        | 1.50 (1H, m)                              | 1.712 (1H, m)                                   | 1.711 (1H, m)                                   |
| 9        | 1.05 (1H, m)                              | 1.272 (1H, m)                                   | 1.271 (1H, m)                                   |
|          | 1.31 (1H, m)                              | 1.269 (1H, m)                                   | 1.268 (1H, m)                                   |
| 10       | 0.87 (3H, t, J = 7.5)                     | 0.933 (3H, t, J = 7.3)                          | 0.933 (3H, t, J = 7.4)                          |
| 11       | 2.65 (2H, m)                              | 2.755 (2H, m)                                   | 2.756 (2H, m)                                   |
| 12       | 1.24 (3H, t, J = 7.5)                     | 1.108 (3H, t, J = 6.7)                          | 1.109 (3H, t, J = 6.7)                          |
| 13       | 4.24 (2H, m)                              | 4.671 (2H, m)                                   | 4.672 (2H, m)                                   |
| 14       | 1.47 (3H, s)                              | 1.988 (3H, s)                                   | 1.989 (3H, s)                                   |
| 15       | 1.64 (3H, d, J = 1.3)                     | 1.590 (3H)                                      | 1.590 (3H)                                      |
| 16       | 0.84 (3H, d, J = 6.7)                     | 1.206 (3H, d, J = 7.6)                          | 1.206 (3H, d, J = 7.6)                          |

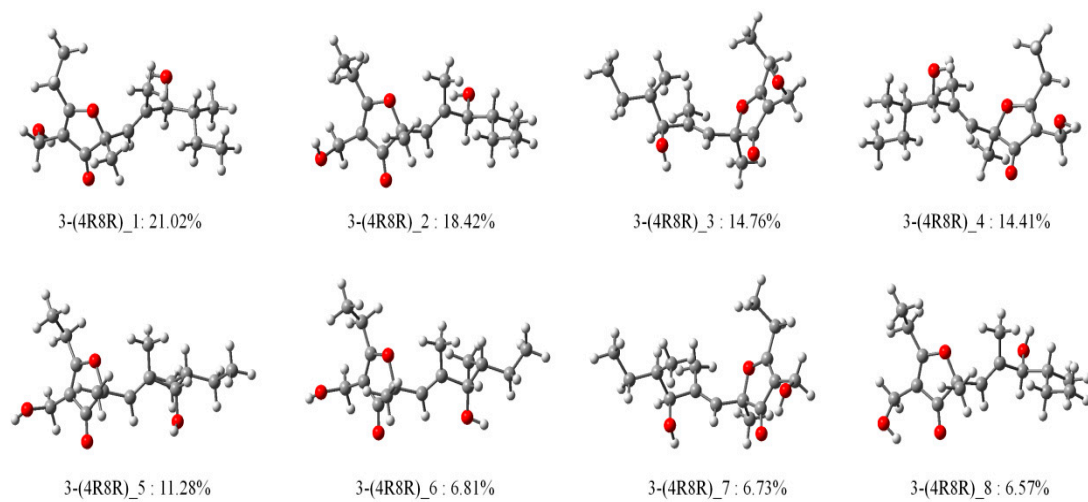

**Figure S16.** Optimized conformers ( $\geq 1\%$ ) of 3-(4*R*, 8*R*).

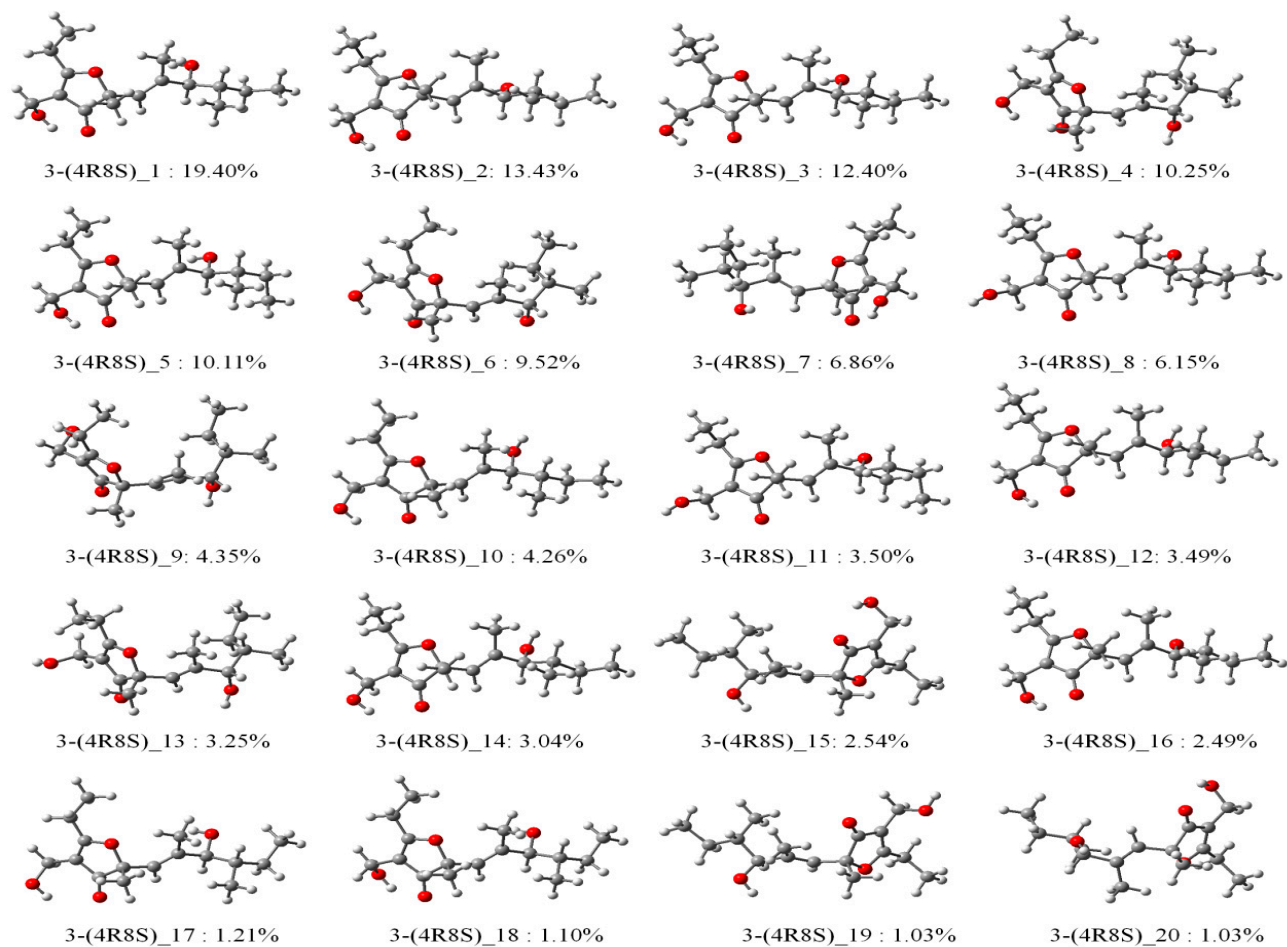

**Figure S17.** Optimized conformers ( $\geq 1\%$ ) of 3-(4R, 8S).

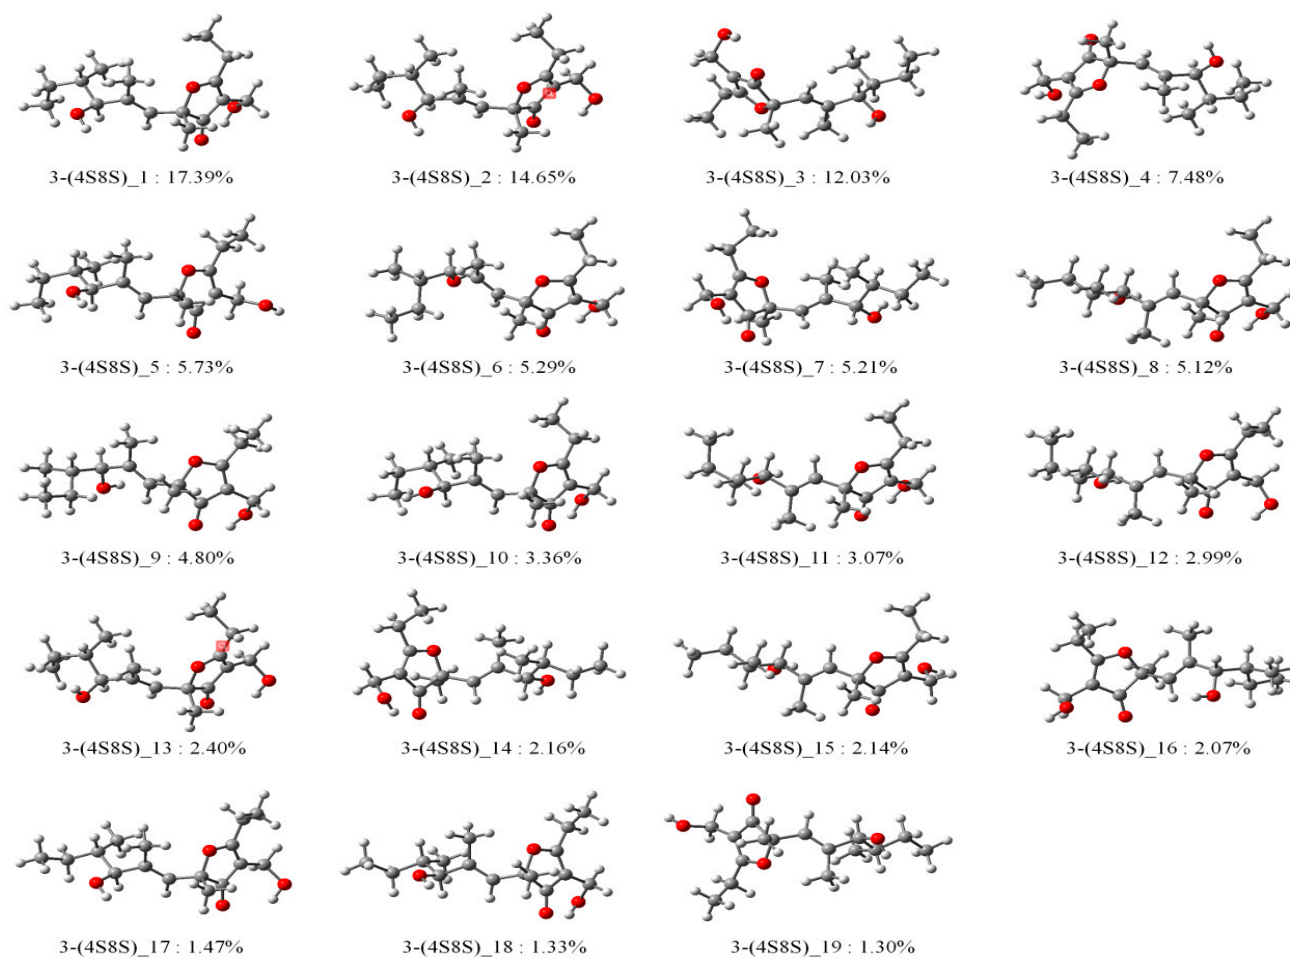

**Figure S18.** Optimized conformers ( $\geq 1\%$ ) of 3-(4S, 8S).

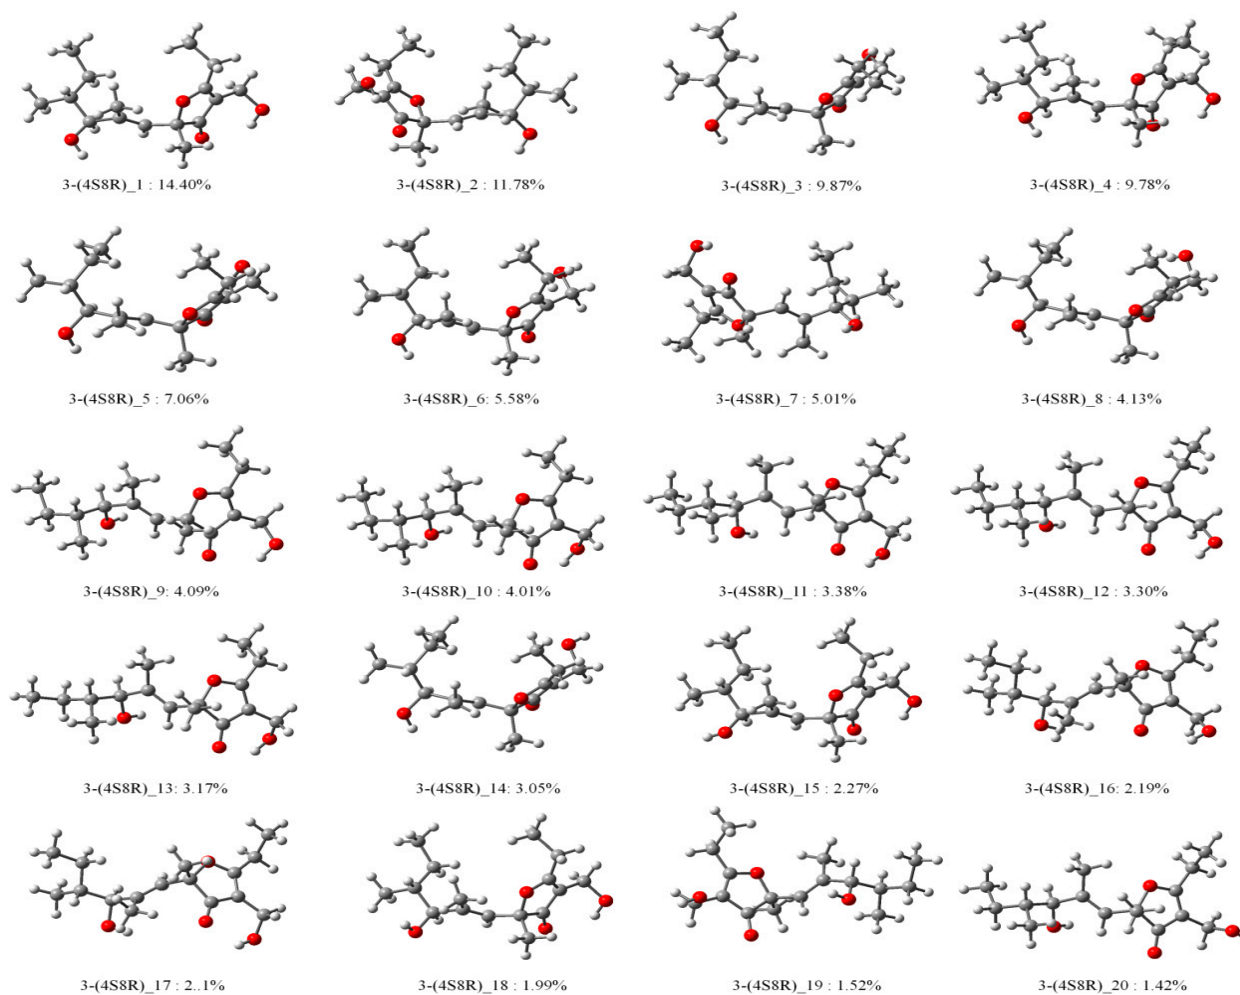

**Figure S19.** Optimized conformers ( $\geq 1\%$ ) of 3-(4S, 8R).
